# Supplementary material
Source: MDPI journal article supplement (https://www.mdpi.com/2073-4395/10/12/1855)
Supplement: s1 [file s1]

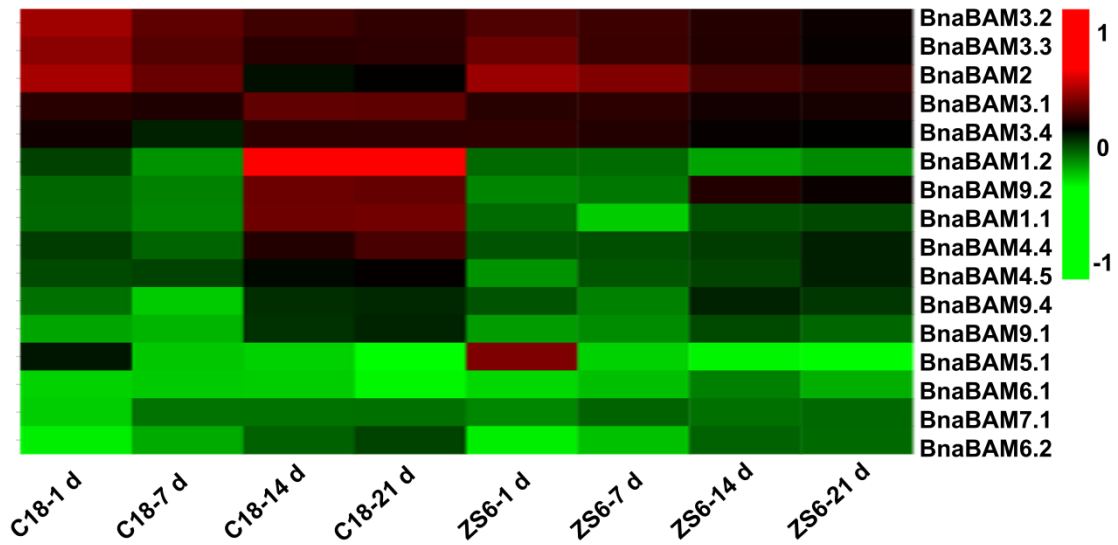

**Figure S1.** Expression profile of BnaBAM genes under long-term cold conditions. The transcripts of BnaBAM genes are investigated and depicted as a heat map. The color scale represents log<sub>2</sub> (expression values), with red denoting high-level transcription and green denoting low-level transcription.

**Table S1.** Primers used in this study.

| Primer name     | Sequence                    |
|-----------------|-----------------------------|
| Actin-rtF       | TTGGAACGATACAGAGAAGATTAGCA  |
| Actin-rtR       | TTGGACCATTCTCGATTGTG        |
| BnaA08g00480D-F | GGAAAATGGGACATACACAACG      |
| BnaA08g00480D-R | AGCCAGTGAACCTCCTGAAACCT     |
| BnaC03g78310D-F | TACACCGACCGCAAAGGC          |
| BnaC03g78310D-R | TAACAAAGTTCTCCATTGGGTCC     |
| BnaC03g78320D-F | GGTATTGAGCAAAGCGTGGAA       |
| BnaC03g78320D-R | GGCTTTCCTTCGGGTTAGA         |
| BnaA07g05790D-F | ATCTGTCCGTGGCGTGTAAG        |
| BnaA07g05790D-R | CACACTATCAAGCGGCATCATC      |
| BnaC09g21440D-F | TGAGTCGTCGCTATCGGTTTC       |
| BnaC09g21440D-R | CTTTACACGCCACGGACAGAT       |
| BnaC08g10900D-F | AGATACCATCATACCCTGAGAGC     |
| BnaC08g10900D-R | GAAGTTTGTGTCCGTGTTCCAGT     |
| BnaA08g08230D-F | GATTGAGAAAGATGGACCTATGAAGTA |

|                 |                              |
|-----------------|------------------------------|
| BnaA08g08230D-R | GGATTCCTTCTCCCAGATTTGTC      |
| BnaC04g04570D-F | GAGATGGTTACTGAGATTGCGT       |
| BnaC04g04570D-R | CGGCGTATCCGTATCCCAC          |
| BnaA02g36650D-F | CTAAGGCGGCACTTGAATGTC        |
| BnaA02g36650D-R | TTACGACGCTCTGTGGAATGAA       |
| BnaC02g31510D-F | AAACCCCAGCCATACCCAGTC        |
| BnaC02g31510D-R | TGTTACATCGCTGTCCGCT          |
| BnaA03g11260D-F | CTCGCTTCTGTCTTGTCCCG         |
| BnaA03g11260D-R | TGTGTTTCTACCAGTCACTTGTATTGTC |
| BnaC03g14120D-F | GACAGTGAAACGCCTGAGAAGTATC    |
| BnaC03g14120D-R | ATCTTTCGCTTGTGTTTCTACCAGT    |
| BnaC03g71580D-F | GGGATTGTGGAGCGTTTCTGT        |
| BnaC03g71580D-R | AAGACTGACGCCTCCTTTTCC        |
| BnaC03g09200D-F | CGCTCCTGCTTACGACCAAC         |
| BnaC03g09200D-R | GAGAGGCAACTTCCCCTTACTG       |
| BnaC07g34180D-F | GCTCCCCTGAAGGTCTGGTC         |
| BnaC07g34180D-R | CTGCTGCCAGTTCTGACCCT         |
| BnaA03g42940D-F | AGCCCGAGCACGCAAAC            |
| BnaA03g42940D-R | ACCCGTTCCCTGAATCCG           |
| BnaA03g37260D-F | CACGGCGAGCGTATCCTTTC         |
| BnaA03g37260D-R | GGCGTTGTATCTGGCTAACATTTG     |
| BnaC03g43570D-F | GAAGCCAGAGTGGGGCAGTA         |
| BnaC03g43570D-R | TCCGCTCGCCGTGATTA            |
| BnaA01g17940D-F | ACAACACCAGGTCACACGCC         |
| BnaA01g17940D-R | TGTTCCAGCCTGCCTCGTC          |
| BnaC01g21190D-F | ACCAGGTCACACGCCGCT           |
| BnaC01g21190D-R | TGTTCCAGCCTGCCTCGTC          |
| BnaA08g05660D-F | TGTTTGGTGGGGAATCATAGAGTC     |
| BnaA08g05660D-R | ACCGCATTGGTGAAACGACA         |

|                 |                            |
|-----------------|----------------------------|
| BnaC04g12480D-F | TGTGGATGGAGAGAAGGGATTG     |
| BnaC04g12480D-R | TTGTGAAGTTCGGTTCGCTGA      |
| BnaA05g10780D-F | TGTGGATGGAGAGAAGGGATTG     |
| BnaA05g10780D-R | GTTGTGAAGTTCGGTTCGCTG      |
| BnaA09g51890D-F | ATGCTGCTTGGGATGCGAA        |
| BnaA09g51890D-R | TAGGTGGCGACCATCAGGG        |
| BnaA05g05170D-F | GATGGGCTTATTGGTTGTCCG      |
| BnaA05g05170D-R | CCCCACCAGCAATCCACTTT       |
| BnaA02g08900D-F | CCGCACTCAGGGATGGTTATG      |
| BnaA02g08900D-R | ATCAAATCTTTCGCTTGTGTTTCTAC |
| BnaC02g12830D-F | CCGCTGTCCAGTGCTACGA        |
| BnaC02g12830D-R | TTGCCTTCTTGAGACGCCAC       |
| BnaA03g07240D-F | TGGCAGCATCAAAGCATCG        |
| BnaA03g07240D-R | GCTCCCATTCTCTGGTAAGTAAACA  |
| BnaA10g16290D-F | TTGCTTGTCTTTGCGGTTG        |
| BnaA10g16290D-R | CAAACCTAATGTGATTCCCGTGA    |
| BnaC09g39140D-F | TTGGGCAACACCATCACGG        |
| BnaC09g39140D-R | GGTTTCCTGTGGACTCAGCGTAG    |

---

**Table S2.** Orthologous gene pairs of BAM-encoding genes between *Arabidopsis* and *B. rapa*, *B. oleracea*, *B. napus*.

| BAM-encoding genes in <i>Arabidopsis</i> |           |          | BAM-encoding genes in <i>B. rapa</i> |          |                |           |          |          | BAM-encoding genes in <i>B. oleracea</i> |                    |           |          |          |          | BAM-encoding genes in <i>B. napus</i> |           |               |          |          |  |
|------------------------------------------|-----------|----------|--------------------------------------|----------|----------------|-----------|----------|----------|------------------------------------------|--------------------|-----------|----------|----------|----------|---------------------------------------|-----------|---------------|----------|----------|--|
| <i>Arabidopsis</i>                       | Gene-Name | Location | start                                | end      | <i>B. rapa</i> | Gene-Name | Location | start    | end                                      | <i>B. oleracea</i> | Gene-Name | Location | start    | end      | <i>B. napus</i>                       | Gene-Name | Location      | start    | end      |  |
| AT3G23920.1                              | AtBAM1    | Chr3     | 8641722                              | 8644199  | Bra015025      | BraBAM1.1 | A07      | 4200669  | 4203428                                  | Bo7g034320.1       | BoBAM1.2  | C7       | 13225248 | 13228060 | BnaA07g05790D                         | BnaBAM1.4 | chrA07        | 6121654  | 6124373  |  |
| AT4G00490.1                              | AtBAM2    | Chr4     | 222422                               | 224862   |                |           |          |          |                                          |                    |           |          |          |          | BnaA09g51890D                         | BnaBAM2   | chrA09_random | 126993   | 129149   |  |
| AT4G17090.1                              | AtBAM3    | Chr4     | 9605266                              | 9607250  | Bra026230      | BraBAM3.1 | A01      | 10498540 | 10500425                                 | Bo1g052940.1       | BoBAM3.1  | C1       | 15029435 | 15031326 | BnaC01g21190D                         | BnaBAM3.1 | chrC01        | 14819094 | 14820988 |  |
|                                          |           |          |                                      |          | Bra012676      | BraBAM3.2 | A03      | 22804184 | 22806081                                 | Bo7g104960.1       | BoBAM3.2  | C7       | 40419711 | 40421605 | BnaA03g42940D                         | BnaBAM3.2 | chrA03        | 21561950 | 21563838 |  |
|                                          |           |          |                                      |          |                |           |          |          |                                          | Bo8g046130.1       | BoBAM9.4  | C8       | 15583635 | 15585005 | BnaC07g34180D                         | BnaBAM3.3 | chrC07        | 37099448 | 37101348 |  |
|                                          |           |          |                                      |          |                |           |          |          |                                          |                    |           |          |          |          | BnaA01g17940D                         | BnaBAM3.4 | chrA01        | 9483862  | 9485751  |  |
|                                          |           |          |                                      |          |                |           |          |          |                                          |                    |           |          |          |          | BnaC08g10900D                         | BnaBAM3.6 | chrC08        | 16342627 | 16343635 |  |
| AT5G55700.1                              | AtBAM4    | Chr5     | 22551873                             | 22554702 | Bra035586      | BraBAM4   | A02      | 7408259  | 7410757                                  | Bo3g021390.1       | BoBAM4.1  | C3       | 7167639  | 7170389  | BnaC03g14120D                         | BnaBAM4.1 | chrC03        | 6768572  | 6771333  |  |
|                                          |           |          |                                      |          |                |           |          |          |                                          | Bo2g037740.1       | BoBAM4.2  | C2       | 10399330 | 10402605 | BnaA03g11260D                         | BnaBAM4.3 | chrA03        | 5050886  | 5053547  |  |
|                                          |           |          |                                      |          |                |           |          |          |                                          |                    |           |          |          |          | BnaA02g08900D                         | BnaBAM4.4 | chrA02        | 4429617  | 4432105  |  |
|                                          |           |          |                                      |          |                |           |          |          |                                          |                    |           |          |          |          | BnaC02g12830D                         | BnaBAM4.5 | chrC02        | 8167152  | 8169713  |  |
| AT4G15210.1                              | AtBAM5    | Chr4     | 8666734                              | 8669357  | Bra038088      | BraBAM5   | A08      | 6619783  | 6622218                                  | Bo8g040610.1       | BoBAM5.1  | C8       | 13860892 | 13862943 | BnaA08g05660D                         | BnaBAM5.1 | chrA08        | 5553480  | 5555924  |  |
| AT2G32290.1                              | AtBAM6    | Chr2     | 13714643                             | 13716906 | Bra005581      | BraBAM6   | A05      | 6338859  | 6341224                                  | Bo4g045870.1       | BoBAM6    | C4       | 10696860 | 10699390 | BnaC04g12480D                         | BnaBAM6.1 | chrC04        | 9717378  | 9719767  |  |
|                                          |           |          |                                      |          |                |           |          |          |                                          |                    |           |          |          |          | BnaA05g10780D                         | BnaBAM6.2 | chrA05        | 5901832  | 5904179  |  |
| AT2G45880.1                              | AtBAM7    | Chr2     | 18878674                             | 18881824 | Bra004944      | BraBAM7   | A05      | 2587413  | 2590431                                  | Bo4g025050.1       | BoBAM7    | C4       | 4131171  | 4134476  | BnaA05g05170D                         | BnaBAM7.1 | chrA05        | 2697113  | 2700136  |  |
|                                          |           |          |                                      |          |                |           |          |          |                                          |                    |           |          |          |          | BnaC04g04570D                         | BnaBAM7.2 | chrC04        | 3393159  | 3396247  |  |
| AT5G45300.1                              | AtBAM8    | Chr5     | 18353636                             | 18356696 | Bra021962      | BraBAM8   | A02      | 17928394 | 17931297                                 | Bo2g127050.1       | BoBAM8    | C2       | 39136275 | 39139346 | BnaC02g31510D                         | BnaBAM8.2 | chrC02        | 33718069 | 33721130 |  |
| AT5G18670.1                              | AtBAM9    | Chr5     | 6226138                              | 6227999  | Bra002178      | BraBAM9.1 | A10      | 11069000 | 11070867                                 | Bo3g013270.1       | BoBAM9.1  | C3       | 4592661  | 4594899  | BnaA10g16290D                         | BnaBAM9.1 | chrA10        | 12426993 | 12428859 |  |
|                                          |           |          |                                      |          |                |           |          |          |                                          | Bo9g154650.1       | BoBAM9.2  | C9       | 46305431 | 46307444 | BnaA03g07240D                         | BnaBAM9.2 | chrA03        | 3214063  | 3216446  |  |
|                                          |           |          |                                      |          |                |           |          |          |                                          |                    |           |          |          |          | BnaC03g09200D                         | BnaBAM9.3 | chrC03        | 4394436  | 4396680  |  |
|                                          |           |          |                                      |          |                |           |          |          |                                          |                    |           |          |          |          | BnaC09g39140D                         | BnaBAM9.4 | chrC09        | 41822923 | 41824840 |  |

**Table S3.** Orthologous gene pairs of BAM-encoding genes between *B. napus* and *B. rapa*, *B. oleracea*.

| <i>B. napus</i> | BAM-encoding genes in <i>B. napus</i> |               |          |          | BAM-encoding genes in <i>B. rapa</i> |           |          |          | BAM-encoding genes in <i>B. oleracea</i> |                    |           |          |          |          |
|-----------------|---------------------------------------|---------------|----------|----------|--------------------------------------|-----------|----------|----------|------------------------------------------|--------------------|-----------|----------|----------|----------|
|                 | Gene-Name                             | Location      | start    | end      | <i>B. rapa</i>                       | Gene-Name | Location | start    | end                                      | <i>B. oleracea</i> | Gene-Name | Location | start    | end      |
| BnaA03g37260D   | BnaBAM1.1                             | chrA03        | 18437399 | 18439520 | Bra015025                            | BraBAM1.1 | A07      | 4200669  | 4203428                                  | Bo3g082110.1       | BoBAM1.1  | C3       | 30584504 | 30586921 |
|                 |                                       |               |          |          | Bra001937                            | BraBAM1.2 | A03      | 19461784 | 19463944                                 | Bo7g034320.1       | BoBAM1.2  | C7       | 13225248 | 13228060 |
| BnaC03g43570D   | BnaBAM1.2                             | chrC03        | 28618604 | 28621024 | Bra015025                            | BraBAM1.1 | A07      | 4200669  | 4203428                                  | Bo3g082110.1       | BoBAM1.1  | C3       | 30584504 | 30586921 |
|                 |                                       |               |          |          | Bra001937                            | BraBAM1.2 | A03      | 19461784 | 19463944                                 | Bo7g034320.1       | BoBAM1.2  | C7       | 13225248 | 13228060 |
| BnaA07g05790D   | BnaBAM1.4                             | chrA07        | 6121654  | 6124373  | Bra015025                            | BraBAM1.1 | A07      | 4200669  | 4203428                                  | Bo3g082110.1       | BoBAM1.1  | C3       | 30584504 | 30586921 |
|                 |                                       |               |          |          | Bra001937                            | BraBAM1.2 | A03      | 19461784 | 19463944                                 | Bo7g034320.1       | BoBAM1.2  | C7       | 13225248 | 13228060 |
| BnaA09g51890D   | BnaBAM2                               | chrA09_random | 126993   | 129149   |                                      |           |          |          |                                          | Bo9g002380.1       | BoBAM2    | C9       | 245084   | 247243   |
| BnaC01g21190D   | BnaBAM3.1                             | chrC01        | 14819094 | 14820988 | Bra026230                            | BraBAM3.1 | A01      | 10498540 | 10500425                                 | Bo1g052940.1       | BoBAM3.1  | C1       | 15029435 | 15031326 |
|                 |                                       |               |          |          | Bra012676                            | BraBAM3.2 | A03      | 22804184 | 22806081                                 | Bo7g104960.1       | BoBAM3.2  | C7       | 40419711 | 40421605 |
| BnaA03g42940D   | BnaBAM3.2                             | chrA03        | 21561950 | 21563838 | Bra026230                            | BraBAM3.1 | A01      | 10498540 | 10500425                                 | Bo1g052940.1       | BoBAM3.1  | C1       | 15029435 | 15031326 |
|                 |                                       |               |          |          | Bra012676                            | BraBAM3.2 | A03      | 22804184 | 22806081                                 | Bo7g104960.1       | BoBAM3.2  | C7       | 40419711 | 40421605 |
|                 |                                       |               |          |          |                                      |           |          |          |                                          | Bo8g046130.1       | BoBAM9.4  | C8       | 15583635 | 15585005 |
| BnaC07g34180D   | BnaBAM3.3                             | chrC07        | 37099448 | 37101348 | Bra026230                            | BraBAM3.1 | A01      | 10498540 | 10500425                                 | Bo1g052940.1       | BoBAM3.1  | C1       | 15029435 | 15031326 |
|                 |                                       |               |          |          | Bra012676                            | BraBAM3.2 | A03      | 22804184 | 22806081                                 | Bo7g104960.1       | BoBAM3.2  | C7       | 40419711 | 40421605 |
|                 |                                       |               |          |          |                                      |           |          |          |                                          | Bo8g046130.1       | BoBAM9.4  | C8       | 15583635 | 15585005 |
| BnaA01g17940D   | BnaBAM3.4                             | chrA01        | 9483862  | 9485751  | Bra026230                            | BraBAM3.1 | A01      | 10498540 | 10500425                                 | Bo1g052940.1       | BoBAM3.1  | C1       | 15029435 | 15031326 |
|                 |                                       |               |          |          | Bra012676                            | BraBAM3.2 | A03      | 22804184 | 22806081                                 | Bo7g104960.1       | BoBAM3.2  | C7       | 40419711 | 40421605 |
|                 |                                       |               |          |          |                                      |           |          |          |                                          | Bo8g046130.1       | BoBAM9.4  | C8       | 15583635 | 15585005 |
| BnaA08g08230D   | BnaBAM3.5                             | chrA08        | 8068950  | 8076869  | Bra026230                            | BraBAM3.1 | A01      | 10498540 | 10500425                                 | Bo1g052940.1       | BoBAM3.1  | C1       | 15029435 | 15031326 |
|                 |                                       |               |          |          | Bra012676                            | BraBAM3.2 | A03      | 22804184 | 22806081                                 | Bo7g104960.1       | BoBAM3.2  | C7       | 40419711 | 40421605 |
|                 |                                       |               |          |          |                                      |           |          |          |                                          | Bo8g046130.1       | BoBAM9.4  | C8       | 15583635 | 15585005 |
| BnaC08g10900D   | BnaBAM3.6                             | chrC08        | 16342627 | 16343635 |                                      |           |          |          |                                          | Bo8g046130.1       | BoBAM9.4  | C8       | 15583635 | 15585005 |

|               |           |        |          |          |           |           |     |          |          |              |          |    |          |          |
|---------------|-----------|--------|----------|----------|-----------|-----------|-----|----------|----------|--------------|----------|----|----------|----------|
| BnaC03g14120D | BnaBAM4.1 | chrC03 | 6768572  | 6771333  | Bra035586 | BraBAM4   | A02 | 7408259  | 7410757  | Bo3g021390.1 | BoBAM4.1 | C3 | 7167639  | 7170389  |
|               |           |        |          |          |           |           |     |          |          | Bo2g037740.1 | BoBAM4.2 | C2 | 10399330 | 10402605 |
| BnaA03g11260D | BnaBAM4.3 | chrA03 | 5050886  | 5053547  | Bra035586 | BraBAM4   | A02 | 7408259  | 7410757  | Bo3g021390.1 | BoBAM4.1 | C3 | 7167639  | 7170389  |
|               |           |        |          |          |           |           |     |          |          | Bo2g037740.1 | BoBAM4.2 | C2 | 10399330 | 10402605 |
| BnaA02g08900D | BnaBAM4.4 | chrA02 | 4429617  | 4432105  | Bra035586 | BraBAM4   | A02 | 7408259  | 7410757  | Bo3g021390.1 | BoBAM4.1 | C3 | 7167639  | 7170389  |
|               |           |        |          |          |           |           |     |          |          | Bo2g037740.1 | BoBAM4.2 | C2 | 10399330 | 10402605 |
| BnaC02g12830D | BnaBAM4.5 | chrC02 | 8167152  | 8169713  | Bra035586 | BraBAM4   | A02 | 7408259  | 7410757  | Bo3g021390.1 | BoBAM4.1 | C3 | 7167639  | 7170389  |
|               |           |        |          |          |           |           |     |          |          | Bo2g037740.1 | BoBAM4.2 | C2 | 10399330 | 10402605 |
| BnaA08g05660D | BnaBAM5.1 | chrA08 | 5553480  | 5555924  | Bra038088 | BraBAM5   | A08 | 6619783  | 6622218  | Bo8g040610.1 | BoBAM5.1 | C8 | 13860892 | 13862943 |
| BnaA08g00480D | BnaBAM5.2 | chrA08 | 296747   | 299203   |           |           |     |          |          | Bo3g185170.1 | BoBAM5.4 | C3 | 64572299 | 64575054 |
| BnaC04g12480D | BnaBAM6.1 | chrC04 | 9717378  | 9719767  | Bra005581 | BraBAM6   | A05 | 6338859  | 6341224  | Bo4g045870.1 | BoBAM6   | C4 | 10696860 | 10699390 |
| BnaA05g10780D | BnaBAM6.2 | chrA05 | 5901832  | 5904179  | Bra005581 | BraBAM6   | A05 | 6338859  | 6341224  | Bo4g045870.1 | BoBAM6   | C4 | 10696860 | 10699390 |
| BnaA05g05170D | BnaBAM7.1 | chrA05 | 2697113  | 2700136  | Bra004944 | BraBAM7   | A05 | 2587413  | 2590431  | Bo4g025050.1 | BoBAM7   | C4 | 4131171  | 4134476  |
| BnaC04g04570D | BnaBAM7.2 | chrC04 | 3393159  | 3396247  | Bra004944 | BraBAM7   | A05 | 2587413  | 2590431  | Bo4g025050.1 | BoBAM7   | C4 | 4131171  | 4134476  |
| BnaC02g31510D | BnaBAM8.2 | chrC02 | 33718069 | 33721130 | Bra021962 | BraBAM8   | A02 | 17928394 | 17931297 | Bo2g127050.1 | BoBAM8   | C2 | 39136275 | 39139346 |
| BnaA10g16290D | BnaBAM9.1 | chrA10 | 12426993 | 12428859 | Bra002178 | BraBAM9.1 | A10 | 11069000 | 11070867 | Bo3g013270.1 | BoBAM9.1 | C3 | 4592661  | 4594899  |
|               |           |        |          |          |           |           |     |          |          | Bo9g154650.1 | BoBAM9.2 | C9 | 46305431 | 46307444 |
| BnaA03g07240D | BnaBAM9.2 | chrA03 | 3214063  | 3216446  | Bra002178 | BraBAM9.1 | A10 | 11069000 | 11070867 | Bo3g013270.1 | BoBAM9.1 | C3 | 4592661  | 4594899  |
|               |           |        |          |          |           |           |     |          |          | Bo9g154650.1 | BoBAM9.2 | C9 | 46305431 | 46307444 |
| BnaC03g09200D | BnaBAM9.3 | chrC03 | 4394436  | 4396680  | Bra002178 | BraBAM9.1 | A10 | 11069000 | 11070867 | Bo3g013270.1 | BoBAM9.1 | C3 | 4592661  | 4594899  |
|               |           |        |          |          |           |           |     |          |          | Bo9g154650.1 | BoBAM9.2 | C9 | 46305431 | 46307444 |
| BnaC09g39140D | BnaBAM9.4 | chrC09 | 41822923 | 41824840 | Bra002178 | BraBAM9.1 | A10 | 11069000 | 11070867 | Bo3g013270.1 | BoBAM9.1 | C3 | 4592661  | 4594899  |
|               |           |        |          |          |           |           |     |          |          | Bo9g154650.1 | BoBAM9.2 | C9 | 46305431 | 46307444 |

---
